# Supplementary material for: Silk Fibroin-Induced Gadolinium-Functionalized Gold Nanoparticles for MR/CT Dual-Modal Imaging-Guided Photothermal Therapy
Source: MDPI journal article supplement (doi:10.3390/jfb13030087), 2022-06-22
Supplement: s1 [file s1]

# Silk fibroin-induced gadolinium-functionalized gold nanoparticles for MR/CT dual-modal imaging-guided photothermal therapy

Chuanxue Yang<sup>1, #</sup>, Tianxiao Mei<sup>1,2, #</sup>, Qingge Fu<sup>3, #</sup>, Yifan Zhang<sup>1</sup>, Yang Liu<sup>1</sup>, Ran Cui<sup>1,2</sup>, Gang Li<sup>4</sup>, Yibin Wang<sup>4</sup>, Jianguo Huang<sup>1</sup>, Junqiang Jia<sup>5, \*</sup>, Bo Chen<sup>1,2, \*</sup>, Yihui Hu<sup>1, \*</sup>

<sup>1</sup> *Institute for Regenerative Medicine, Jian Hospital & Shanghai East Hospital, School of Life Sciences and Technology & School of Medicine, Tongji University, Shanghai 200092, China*

<sup>2</sup> *Department of Hepatopancreatobiliary Surgery, Jian Hospital & Shanghai East Hospital, Jian, Jiangxi 343000 China*

<sup>3</sup> *Department of Orthopedic trauma, Changhai Hospital, Naval Medical University, Shanghai 200433, China*

<sup>4</sup> *Department of Radiology, Shanghai East Hospital, School of Medicine, Tongji University, Shanghai 200092 China*

<sup>5</sup> *School of Grain Science and Technology, Jiangsu University of Science and Technology, Zhenjiang, Jiangsu 212100, China*

**Keywords:** silk fibroin; AuNPs; biomimetic synthesis; MR/CT imaging; PTT

#: equally contributed

\* Corresponding author; Junqiang Jia, Bo Chen, Yihui Hu

Email: jjajq@just.edu.cn; chenbo7349@sohu.com; yihuihu2020@163.com

## Supporting methods

### Calculation of photothermal conversion efficiency

The photothermal conversion of Gd:AuNPs@SF was evaluated by the temperature change of aqueous dispersion (250 µg/mL) as a function of time under 808 nm laser irradiation at a power density of 3.0 W/cm<sup>2</sup> until the solution reached a steady temperature. The temperature change of the aqueous solution was recorded by the infrared imager. The  $\eta$  value was calculated as follows:

$$\eta = \frac{hS(T_{max}-T_{surr})-Q_{dis}}{I(1-10^{-A_{808}})} \quad (1)$$

Here,  $h$  is heat transfer coefficient,  $S$  is the surface area of the container,  $T_{max}$  is the equilibrium temperature,  $T_{surr}$  is the ambient temperature of the surroundings,  $Q_{dis}$  expresses the heat dissipation from the light absorbed by the quartz sample cell,  $I$  is incident laser power (3.0 W/cm<sup>2</sup>),  $A_{808}$  is the absorbance of Gd:Au@SF NPs at 808 nm (0.375).  $hS$  was calculated as followed:

$$hS = \frac{\Sigma_i m_i c_{p,i}}{\tau_s} \approx \frac{cm}{\tau_s} \quad (2)$$

The  $m$  and  $c$  are the weight and specific heat capacity of solvent (water), respectively,  $\tau_s$  is the heat dissipation time constant. Whereas,  $\tau_s$  is calculated by plotting a linear data of cooling period with the negative logarithm using the following equation:

$$t = -\tau_s \ln \frac{T-T_{surr}}{T_{max}-T_{surr}} = -\tau_s \ln \theta \quad (3)$$

$Q_{dis}$  represents the emitted by the solvent absorbing the 808 nm laser, measured by a control experiment of water, calculated using the following equation:

$$Q_{dis} = cm\Delta T_{H_2O} \quad (4)$$

Supporting figures and tables

Table S1. Data for photothermal conversion efficiency.

|             | $\tau_s$ (s) | $hS$<br>(W/°C) | $T_{\text{max}}-T_{\text{surr}}$<br>(°C) | $Q_{\text{dis}}$<br>(W) | $I$<br>(W/cm <sup>2</sup> ) | $A_{808}$ | $\eta$  |
|-------------|--------------|----------------|------------------------------------------|-------------------------|-----------------------------|-----------|---------|
| Gd:AuNPs@SF | 205.6        | 0.020428       | 19.4                                     | 0.021                   | 3                           | 0.375     | 21.63 % |

**Table S2.** Summarized methods for synthesizing nanoparticles involving gold and SF.

| Nanoparticles                                 | Synthetic Method                  | Advantages                                                 | Applications                                         | Ref       |
|-----------------------------------------------|-----------------------------------|------------------------------------------------------------|------------------------------------------------------|-----------|
| <b>AuNPs</b>                                  | Turkevich synthesis               | Dispersity and size reproducibility                        | Large-scale production                               | [1]       |
| <b>AuNPs</b>                                  | Brust synthesis                   | High thermal stability                                     | NA                                                   | [2]       |
| <b>AuNPs</b>                                  | Greener synthesis                 | Facile and eco-friendly method                             | NA                                                   | [3]       |
| <b>BSA-Au NCs</b>                             | Biom mineralization               | “Green” method, highly fluorescent rate                    | Provided protocol to proteins and noble metals       | [4]       |
| <b>AuPt@SF NPs</b>                            | Biom mineralization               | Responsive to tumor microenvironmental                     | Tumor theranostics.                                  | [5]       |
| <b>AuNPs/SF</b>                               | Self-Assembly                     | High NIR absorption and photothermal conversion efficiency | Tumor photothermal therapy                           | [6]       |
| <b>SF@MnO<sub>2</sub>/ICG/DOX nanocomplex</b> | Biom mineralization               | Multifunction complex                                      | Tri-modal imaging-assisted cancer therapy            | [7]       |
| <b>ICG-SFNPs</b>                              | Desolvation (acetone)             | Low energy consumption                                     | Tumor imaging and therapeutic                        | [8]       |
| <b>ACC-DOX-SF NPs</b>                         | Gas diffusion Biom mineralization | TME-responsive                                             | Cancer chemotherapy                                  | [9]       |
| <b>Gd:AuNPs@SF</b>                            | Biomimetic synthesis              | Multifunctional theranostic nanoplatform                   | MR/CT dual-modal imaging-guided photothermal therapy | This work |

**Table S3.** The quantitative analysis of Gd and Au in main organs and tumors by ICP-OES.

| Sample | Au (mg/L) |          |          |       | Gd (mg/L) |          |          |       |
|--------|-----------|----------|----------|-------|-----------|----------|----------|-------|
|        | Number 1  | Number 2 | Number 3 | mean  | Number 1  | Number 2 | Number 3 | mean  |
| Heart  | 0.217     | 0.263    | 0.292    | 0.257 | 0.002     | 0.003    | 0.001    | 0.002 |
| Liver  | 0.818     | 0.826    | 0.847    | 0.83  | 0.274     | 0.278    | 0.278    | 0.277 |
| Spleen | 0.887     | 1.079    | 1.175    | 1.047 | 0.021     | 0.019    | 0.02     | 0.02  |
| Lung   | 0.687     | 0.792    | 0.839    | 0.773 | 0.773     | 0.019    | 0.018    | 0.019 |
| Kidney | 0.205     | 0.247    | 0.272    | 0.241 | 0.004     | 0.006    | 0.004    | 0.005 |
| Tumor  | 0.273     | 0.325    | 0.359    | 0.319 | 0.001     | 0.001    | 0.002    | 0.001 |

### Supplementary Figure S1

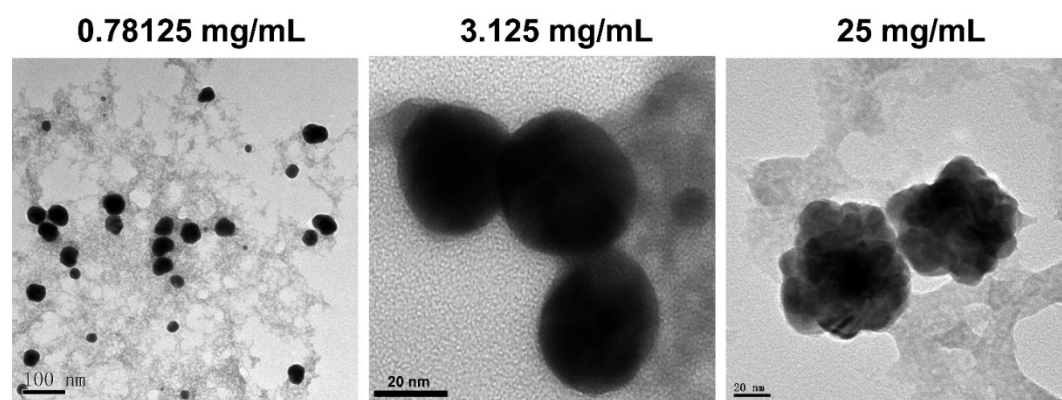

TEM imaging of Gd:AuNPs@SF with different SF concentration (0.78125, 3.125, 25 mg/mL).

Supplementary Figure S2

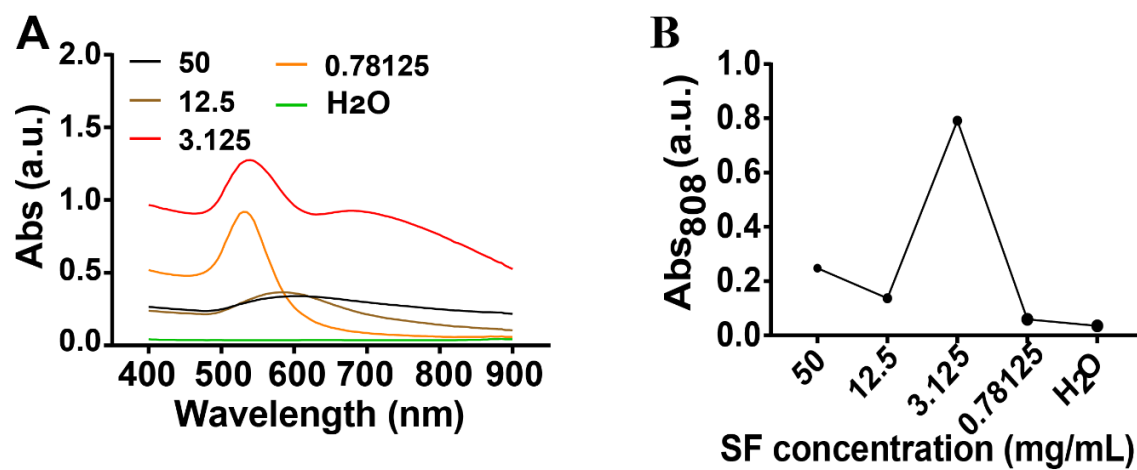

UV-vis spectra of Gd:AuNPs@SF synthesized with different SF concentrations (0.78125, 3.125, 12.5, 50 mg/mL). (A) UV-vis spectra of Gd:AuNPs@SF with a series of SF concentrations, and (B) UV-vis absorption of corresponding Gd:AuNPs@SF at 808 nm.

Supplementary Figure S3

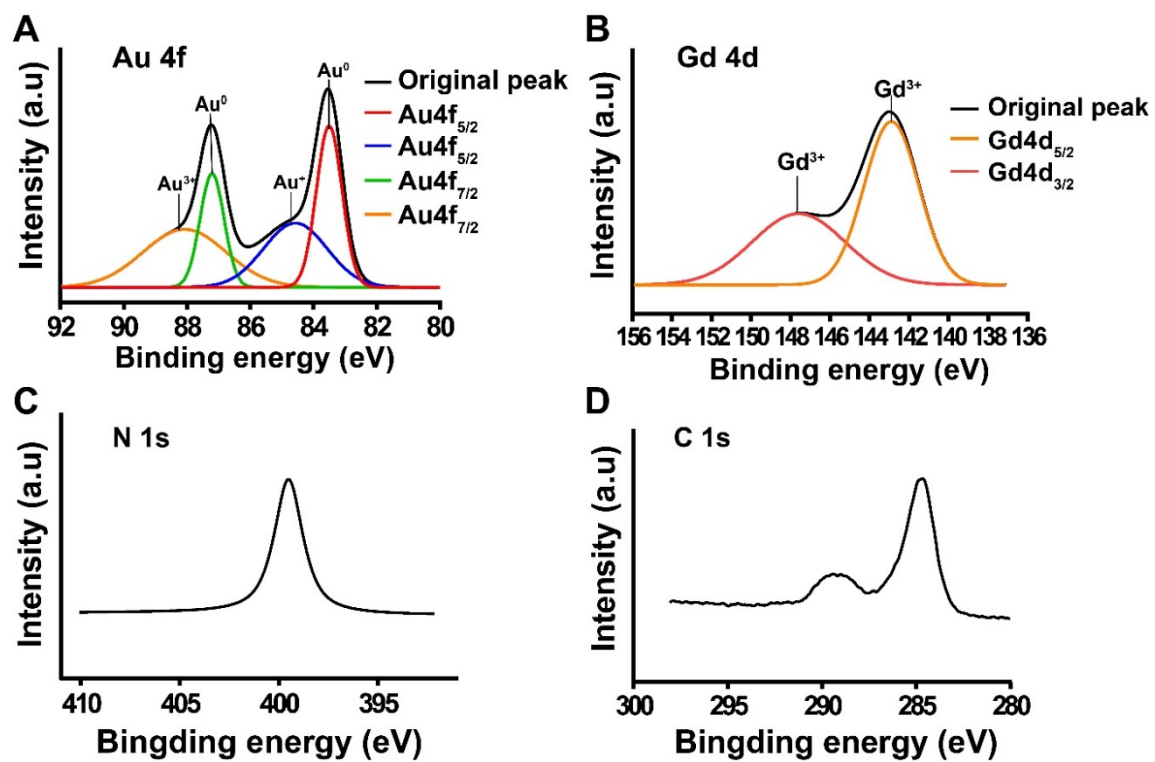

Core level XPS spectra of Au (4f), Gd (4d), N (1s), C (1s) in Gd:AuNPs@SF.



Supplementary Figure S4

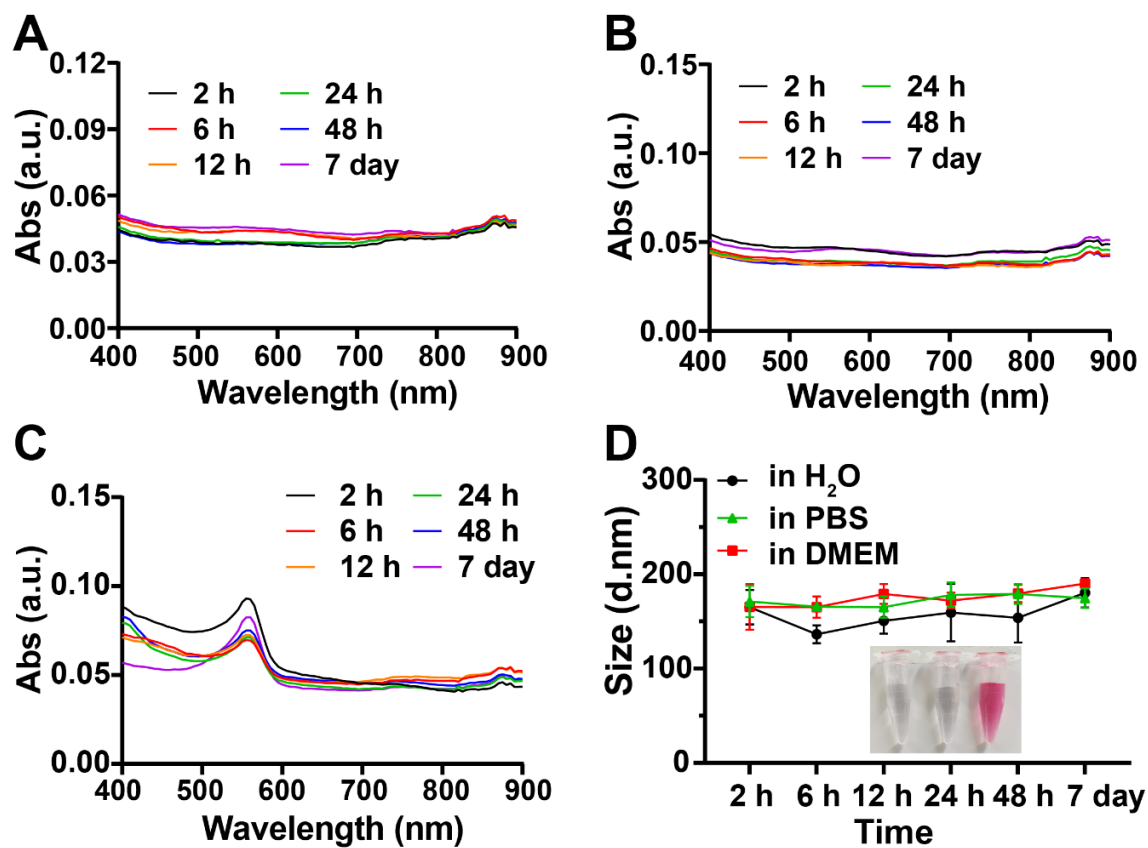

Stability analysis of Gd:AuNPs@SF. UV-vis spectra of Gd:AuNPs@SF dispersed in water (A), PBS (B), and DMEM (C), and the corresponding hydrodynamic diameter (D). The inset is a 7 days digital photo.

Supplementary Figure S5

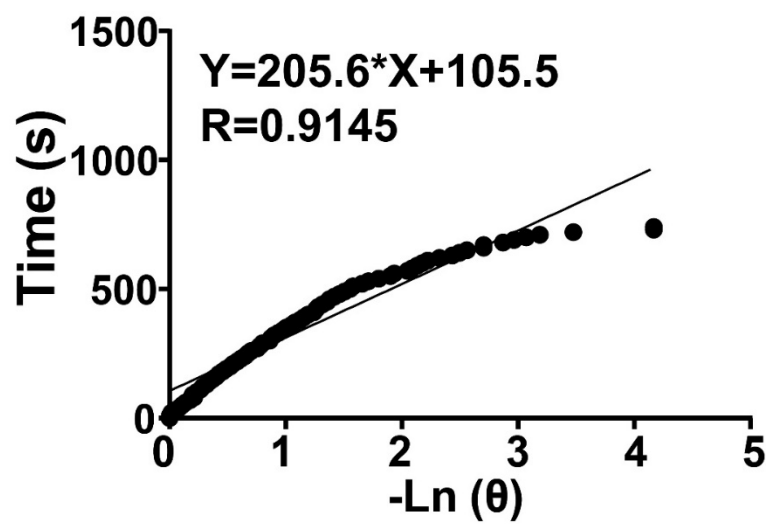

Calculation of the heat transfer constant of Gd:AuNPs@SF after irradiation by 808 nm laser.

Supplementary Figure S6

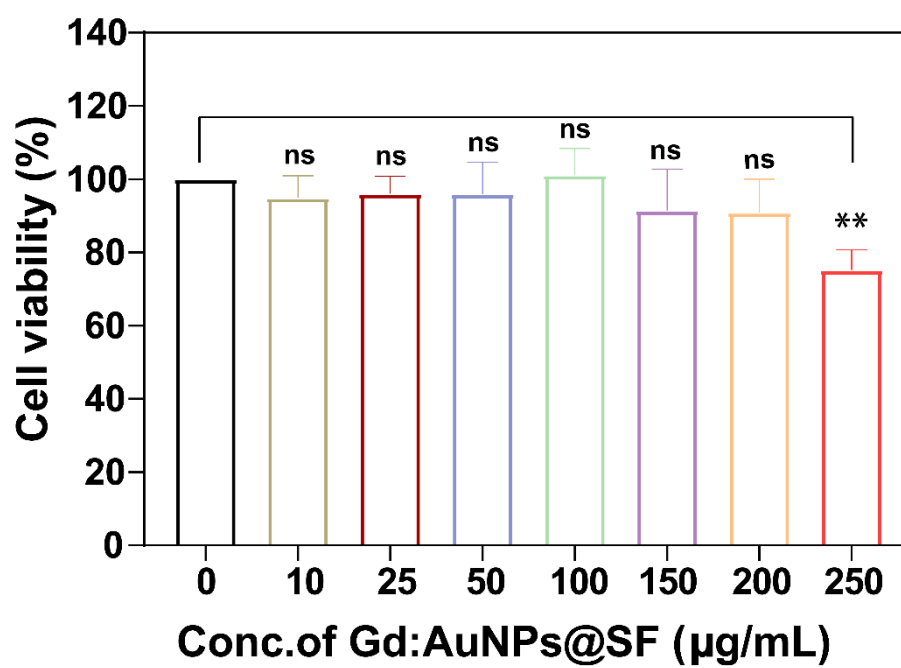

Viability of HUVEC cell after being incubated with Gd:AuNPs@SF at different concentrations for 24 h. (ns  $P > 0.05$ ; \*\*  $P < 0.01$ )

**Supplementary Figure S7**

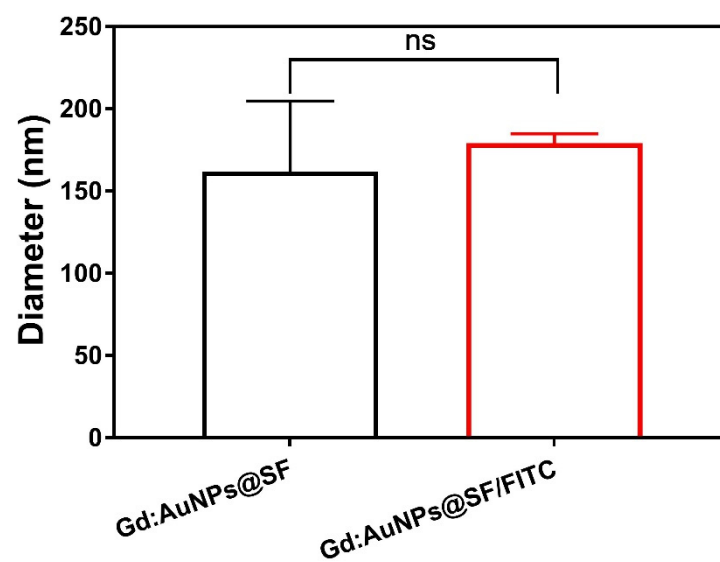

The average particle size of Gd:AuNPs@SF and Gd:AuNPs@SF/FITC. (ns  $P > 0.05$ ).

Supplementary Figure S8

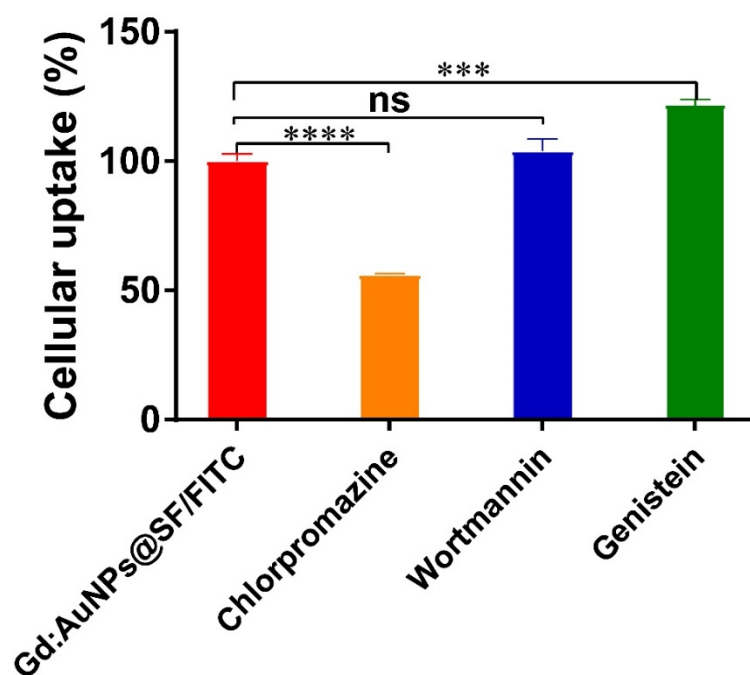

Flow cytometry assay of FITC contents inside Pan02 cells treated with Gd:AuNPs@SF/FITC in the absence or presence of chlorpromazine (10  $\mu\text{g/mL}$ ), genistein (200  $\mu\text{g/mL}$ ), or wortmannin (100  $\text{ng/mL}$ ), respectively. (ns  $P > 0.05$ ; \*\*\* $P < 0.001$ ; \*\*\*\* $P < 0.0001$ ).

Supplementary Figure S9

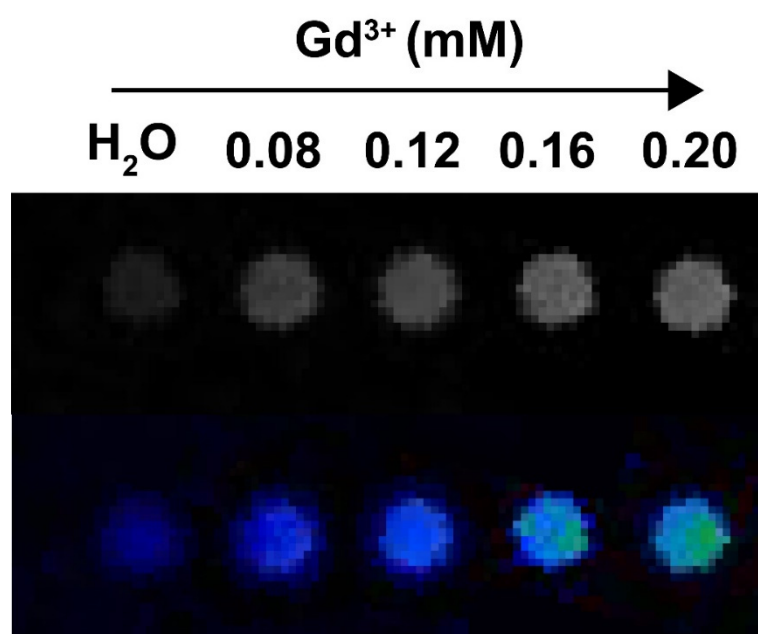

T<sub>1</sub>-weighted and false-color-mapped of different Gd<sup>3+</sup> concentrations (0-0.20 mM) of Gd-DTPA in water.

Supplementary Figure S10

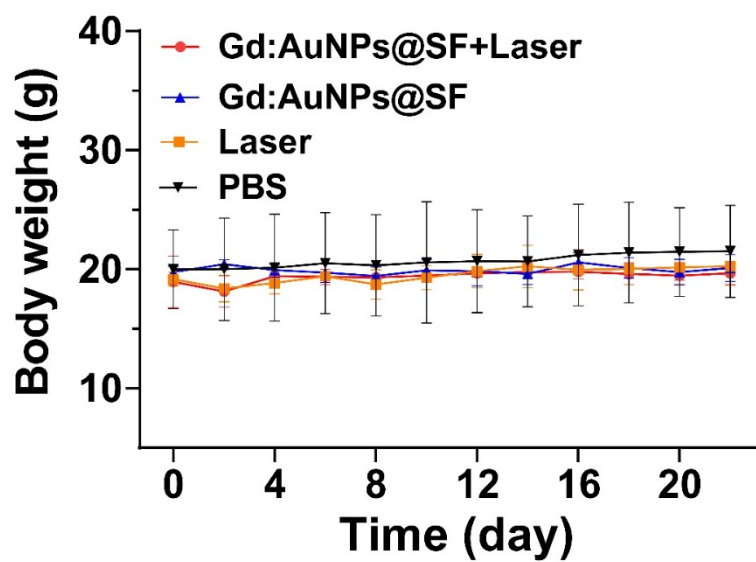

The bodyweight of tumor-bearing mice after being treated by Gd:AuNPs@SF + laser, Gd:AuNPs@SF, laser, PBS for 22 days.

### Supplementary Figure S11

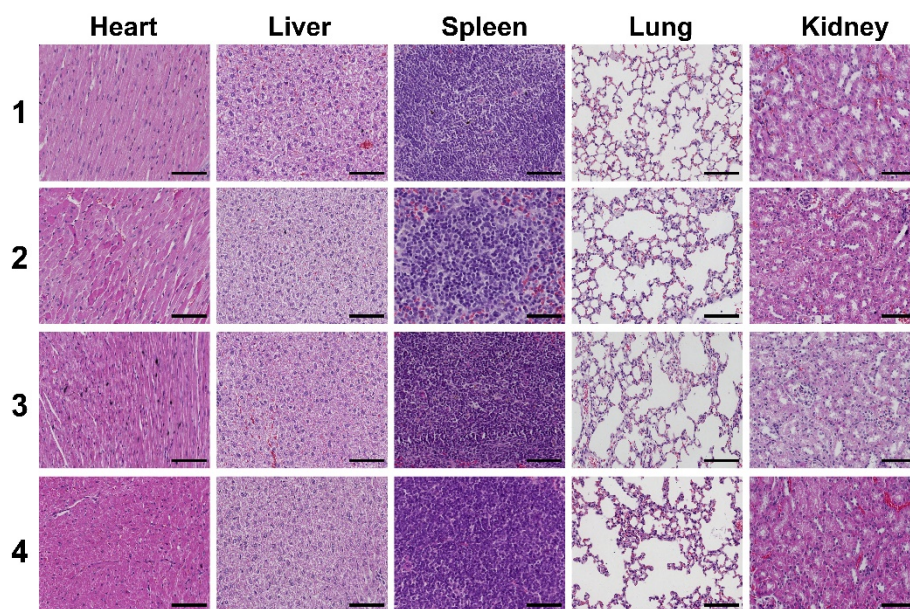

H&E staining images of the main organs (heart, liver, spleen, lung, and kidney) were collected from the mice after 22 days of photothermal treatment (scale bare: 100  $\mu\text{m}$ ). 1: Gd:AuNPs@SF + Laser, 2: Gd:AuNPs@SF, 3: Laser, 4: PBS.



## References

1. Schulz F, Homolka T, Bastús NG, Puentes V, Weller H, Vossmeier T. Little adjustments significantly improve the Turkevich synthesis of gold nanoparticles. *Langmuir*, **2014**, *30*, 10779-10784.
2. Brust M, Walker M, Bethell D, Schiffrin DJ, Whyman R. Synthesis of thiol-derivatised gold nanoparticles in a two-phase Liquid–Liquid system. *J Chem Soc, Chem Commun*, **1994**, *7*, 801-802.
3. Kharissova OV, Dias HV, Kharisov BI, Pérez BO, Pérez VM. The greener synthesis of nanoparticles. *Trends Biotechnol*, **2013**, *31*, 240-248.
4. Xie J, Zheng Y, Ying JY. Protein-directed synthesis of highly fluorescent gold nanoclusters. *J Am Chem Soc*, **2009**, *131*, 888-889.
5. Yang R, Fu S, Li R, Zhang L, Xu Z, Cao Y, et al. Facile engineering of silk fibroin capped AuPt bimetallic nanozyme responsive to tumor microenvironmental factors for enhanced nanocatalytic therapy. *Theranostics*, **2021**, *11*, 107-116.
6. Wang J, Zhang Y, Jin N, Mao C, Yang M. Protein-Induced Gold Nanoparticle Assembly for Improving the Photothermal Effect in Cancer Therapy. *ACS Appl Mater Interfaces*, **2019**, *11*, 11136-11143.
7. Yang R, Hou M, Gao Y, Lu S, Zhang L, Xu Z, et al. Biomineralization-inspired Crystallization of Manganese Oxide on Silk Fibroin Nanoparticles for in vivo MR/fluorescence Imaging-assisted Tri-modal Therapy of Cancer. *Theranostics*, **2019**, *9*, 6314-6333.
8. Xu HL, ZhuGe DL, Chen PP, Tong MQ, Lin MT, Jiang X, et al. Silk fibroin nanoparticles dyeing indocyanine green for imaging-guided photo-thermal therapy of glioblastoma. *Drug Deliv*, **2018**, *25*, 364-375.
9. Tan M, Liu W, Liu F, Zhang W, Gao H, Cheng J, et al. Silk Fibroin-Coated Nanoagents for Acidic Lysosome Targeting by a Functional Preservation Strategy in Cancer Chemotherapy. *Theranostics*, **2019**, *9*, 961-973.
